# Supplementary material for: Anthropogenic changes in waterways produce “drought-like” layers in shelf sediments
Source: Oxford University Press journal article supplement (doi:10.1525/elementa.2021.00039), 2022-01-01
Supplement: kalman_et_al_elementa_supplementary_data.xlsx [file kalman_et_al_elementa_supplementary_data.xlsx]

## Sheet: Red Sea long cores
NBE core	Fines	Porosity	Elements					Microplastics					NBW core	Fines	Porosity	Elements					Microplastics
Depth (cm)	silt+clay (%)	(φ)	Fe (%)	Al (%)	Si (%)	Ca (%)	CaCO3 (%)	items/triple unit					Depth (cm)	silt+clay (%)	(φ)	Fe (%)	Al (%)	Si (%)	Ca (%)	CaCO3 (%)	items/triple unit
1	65.2695	0.626001	2.957	5.02323	19.9777	9.9918	24.9795						1	26.294	0.586391	2.28942	4.22661	18.9884	10.2093	25.5234
2	76.9671	0.59794	3.56978	5.61502	20.1592	9.47687	23.6922	0					2	22.2643	0.528045	2.30336	4.15829	19.2424	9.99454	24.9864	1
3	27.5543	0.533622	3.31816	5.54692	20.1877	8.92433	22.3108						3	21.1102	0.497779	2.19639	4.01906	19.4284	10.3444	25.8609
4	38.918	0.468149	2.52761	4.77609	20.9189	8.44127	21.1032						4	22.6532	0.49604	2.28344	4.11304	19.8689	9.95664	24.8916
5	49.9183	0.476815	2.60492	4.88095	20.7625	8.44181	21.1045	0					5	21.6896	0.48861	2.29174	4.16124	19.7742	9.86635	24.6659	0
6	38.31	0.469147	2.0457	4.64602	22.8571	7.32248	18.3062						6	19.352	0.488337	2.24105	4.12937	19.9024	9.97188	24.9297
7	36.7635	0.451694	1.92582	4.50662	23.1041	6.64626	16.6157						7	20.6599	0.490451	2.32292	3.92009	19.9024	10.1019	25.2548
8	30.0778	0.433932	2.23165	4.94612	22.4284	7.17183	17.9296	0					8	18.4004	0.496292	2.18372	4.03078	19.1289	10.7298	26.8244	1
9	18.9268	0.420991	2.21257	4.6698	22.5759	7.48834	18.7209						9	20.4601	0.493606	2.08144	3.69778	21.2577	9.63823	24.0956
10	9.58395	0.420824	1.95186	4.5295	23.7437	6.46099	16.1525						10	19.1687	0.491795	2.03331	3.3506	22.7726	9.48239	23.706
11	11.5354	0.41262	1.85828	4.44875	23.4992	6.50035	16.2509	0					11	20.0007	0.503255	2.25463	3.9322	18.6205	10.4683	26.1709	0
12	20.4419	0.417867	2.11618	4.48857	22.5755	7.19117	17.9779						12	21.3414	0.487	2.31987	4.07334	18.9485	10.5064	26.266
13	20.2674	0.418357	1.93811	4.486	23.2916	6.67732	16.6933						13	23.5626	0.491118	2.2873	4.14951	19.545	10.2513	25.6283
14	20.1427	0.420916	2.24945	4.61099	21.5941	7.44913	18.6228	0					14	21.4486	0.494872	2.24525	3.93933	19.2759	10.1122	25.2805	1
15	16.9241	0.438746	2.12655	4.55983	21.7593	7.55443	18.8861						15	20.6003	0.495211	2.30745	4.00082	18.9032	10.4615	26.1539
16	22.1937	0.446234	2.26223	4.60514	21.1918	7.56013	18.9003						16	24.246	0.49376	2.29979	4.00204	19.0513	10.31	25.775
17	22.5938	0.441477	2.2613	4.72084	21.158	7.8082	19.5205	0					17	24.0036	0.496217	2.33281	4.08456	19.123	10.4736	26.1839	1
18	23.4186	0.435593	2.30993	4.89565	21.3815	7.79261	19.4815						18	21.7175	0.488119	2.13525	3.9877	18.8825	11.0689	27.6721
19	16.9608	0.442761	2.12397	4.7269	21.5429	7.63187	19.0797						19	20.946	0.474558	2.20531	3.89687	19.9348	10.0492	25.123
20	25.0574	0.446264	2.42502	4.80022	19.8464	8.65101	21.6275	0					20	24.4218	0.474935	2.27193	4.03136	19.2314	10.5395	26.3488	0
21	17.7497	0.440919	2.46631	4.91946	20.8401	8.66742	21.6686						21	27.4068	0.470293	2.2813	4.0474	19.0448	10.4195	26.0487
22	18.0047	0.427178	2.46586	4.92534	21.5737	7.93894	19.8473						22	25.0129	0.473974	2.31235	4.10452	19.2876	10.5687	26.4218
23	17.7964	0.431669	2.03824	4.58802	21.3113	7.96948	19.9237	0					23	27.6741	0.477256	2.29605	4.01421	19.057	10.3522	25.8805	0
24	15.0803	0.420348	2.00107	4.74873	22.2518	7.33896	18.3474						24	30.0153	0.48865	2.44485	4.19662	19.0146	10.4463	26.1158
25	16.089	0.431036	2.19506	4.79854	21.202	7.97932	19.9483						25	26.6244	0.495968	2.38546	4.25481	19.2244	10.5645	26.4112
26	14.2403	0.425532	2.22936	4.78443	21.2584	7.79166	19.4792	0					26	34.9591	0.476364	2.51772	4.32711	19.162	10.064	25.16	0
27	22.069	0.43057	2.27746	4.83552	21.6164	7.7996	19.499						27	34.0095	0.472308	2.55605	4.29022	18.8655	10.2514	25.6286
28	19.6962	0.424758	2.17143	4.72186	21.6728	7.45748	18.6437						28	34.8265	0.477597	2.35078	4.19221	19.0249	10.3238	25.8094
29	21.1172	0.42678	2.08296	4.75518	21.8009	7.55195	18.8799	0					29	36.8131	0.48759	2.41843	4.27437	19.3749	10.1278	25.3195	0
30	20.7785	0.425755	2.13736	4.71327	21.382	7.57986	18.9496						30	39.2199	0.48532	2.49341	4.36414	19.0935	10.1452	25.363
31	14.0007	0.423715	2.08101	4.47657	20.8018	7.77309	19.4327						31	36.4795	0.477317	2.44028	4.38227	19.6406	9.91604	24.7901
32	14.5105	0.424871	2.05986	4.50743	21.825	7.64963	19.1241	0					32	38.4951	0.481453	2.43535	4.24682	19.1772	10.2984	25.746	0
33	15.2694	0.421102	2.25248	4.63976	21.7768	7.4075	18.5187						33	27.3806	0.485509	2.55946	4.46243	19.1703	10.2688	25.672
34	12.2058	0.420739	2.06582	4.74575	22.2032	7.28541	18.2135						34	38.0342	0.473992	2.50634	4.33295	19.1175	10.0972	25.2431
35	13.5444	0.420274	2.39658	4.90184	20.8793	7.77862	19.4465	0					35	33.8245	0.463073	2.45384	3.85238	20.1973	9.89244	24.7311	0
36	16.8836	0.42302	2.08448	4.72107	21.7392	7.58321	18.958						36	35.7088	0.46327	2.56644	4.35643	18.772	10.2049	25.5121
37	22.1502	0.431246	2.20481	4.81915	21.6585	7.71486	19.2872						37	40.7038	0.463294	2.47761	4.21015	19.9916	9.99977	24.9994
38	19.6342	0.419114	2.19364	4.87785	21.9601	7.35092	18.3773	0					38	48.9253	0.450061	2.3233	3.99555	20.8164	9.55488	23.8872	0
39	20.3892	0.415665	2.27819	4.7574	21.4331	7.6147	19.0367						39	45.8502	0.448227	2.55813	4.4023	18.8218	10.4052	26.013
40	17.8606	0.415924	2.17229	4.73415	21.6613	7.56723	18.9181						40	35.5403	0.445689	2.53912	4.40101	18.723	10.5265	26.3163
41	12.8527	0.420112	2.23974	4.85089	21.2274	7.85852	19.6463	0					41	44.9681	0.453654	2.59179	4.39886	18.4774	10.4847	26.2117	1
42	17.2108	0.420897	2.59601	5.14076	20.628	8.22984	20.5746						42	48.2892	0.451558	2.5752	4.41273	18.7039	10.3822	25.9556
43	24.253	0.426534	2.49044	4.83862	20.4847	8.08232	20.2058						43	42.8725	0.451709	2.64303	4.53835	18.9534	10.4093	26.0233
44	21.0221	0.42225	1.99109	4.64653	21.9738	7.33017	18.3254	0					44	44.9107	0.462446	2.50248	4.26874	18.8077	10.6921	26.7303	0
45	19.5751	0.420987	1.86324	4.64281	22.3675	7.39052	18.4763						45	51.7991	0.474448	2.58203	4.36811	19.119	10.2145	25.5362
46	14.8071	0.415874	2.37349	4.89792	21.0197	7.95883	19.8971						46	44.7105	0.472767	2.58716	4.29979	19.1159	10.3349	25.8373
47	20.9077	0.408969	2.07116	4.64554	21.9676	7.39041	18.476	0					47	49.0188	0.468477	2.47484	4.37172	19.0465	10.2338	25.5846	0
48	21.3137	0.41012	2.02072	4.67949	23.1006	7.08184	17.7046						48	44.3384	0.47598	2.51339	4.37485	19.1317	10.0922	25.2306
49	28.8189	0.406402	1.877	4.39635	22.6176	7.43525	18.5881						49	46.1768	0.468559	2.51479	4.41805	19.1192	10.3101	25.7753
50	24.3843	0.410388	2.27613	4.60449	20.8211	8.13388	20.3347	0					50	45.2303	0.458416	3.00302	4.88789	20.1934	8.6844	21.711	0
51	14.7847	0.414033	2.12188	4.65716	22.0795	7.5235	18.8088						51	40.4852	0.450014	2.9012	4.57716	19.0514	9.86741	24.6685
52	14.333	0.424903	2.11087	4.55231	21.492	7.50831	18.7708						52	46.3118	0.447338	2.99357	4.73302	19.0658	9.81929	24.5482
53	15.0994	0.415987	2.01559	4.51002	21.9166	7.25674	18.1419	0					53	49.5757	0.442148	2.85872	4.66736	19.172	9.93188	24.8297	0
54	10.2512	0.414397	2.04055	4.51429	22.4733	7.4733	18.6832						54	54.4316	0.433652	2.85545	4.68518	19.1107	9.85279	24.632
55	12.5712	0.414589	2.05212	4.57997	22.3576	6.98303	17.4576						55	54.9156	0.433347	2.73761	4.69148	19.4535	9.74125	24.3531
56	12.6413	0.419129	2.05199	4.62765	21.922	7.14723	17.8681	0					56	39.4982	0.445748	2.9505	4.96282	19.0535	10.1411	25.3526	0
57	14.4898	0.421897	2.20278	4.64867	21.4879	7.20737	18.0184						57	33.1039	0.450234	2.42823	4.29192	18.604	10.5563	26.3908
58	14.3102	0.42767	2.05543	4.64134	21.94	7.02837	17.5709						58	29.6476	0.443008	2.3961	4.31237	19.088	9.98966	24.9742
59	16.5405	0.425489	2.11661	4.63201	21.703	7.33281	18.332	0					59	27.9732	0.441496	2.4872	4.30178	19.0752	10.0758	25.1895	0
60	15.2405	0.431596	2.20269	4.61923	21.087	7.99559	19.989						60	31.5716	0.450356	2.48251	4.35563	19.3961	9.66351	24.1588
61	13.0011	0.419918	2.12211	4.66604	21.7625	7.34211	18.3553						61	28.0297	0.451553	2.55496	4.30677	18.8298	10.0976	25.2439
62	14.2975	0.42202	2.12027	4.49504	21.6392	7.16635	17.9159	0					62	26.1379	0.4534	2.48669	4.32362	18.6807	10.1962	25.4905	0
63	13.7587	0.422013	2.05482	4.59561	21.767	7.29421	18.2355						63	25.8211	0.447382	2.46742	4.3517	19.2029	9.97066	24.9266
64	13.1114	0.440729	2.31885	4.6931	20.875	7.84091	19.6023						64	32.6389	0.443742	2.4358	4.32488	19.2609	10.0349	25.0872
65	14.8938	0.442943	2.12424	4.45078	21.0994	7.69804	19.2451	0					65	23.2016	0.46139	2.37589	4.26457	18.9403	10.1542	25.3855	0
66	13.4456	0.427531	2.16505	4.54924	21.1629	7.56766	18.9192						66	24.4956	0.451947	2.43656	4.24744	19.1007	10.1368	25.342
67	15.9398	0.434674	2.14937	4.66144	21.0213	8.14114	20.3528						67	28.1305	0.460165	2.67708	4.36886	18.43	10.2217	25.5542
68	17.3024	0.411089	2.11892	4.74604	22.2298	7.01274	17.5318	0					68	33.1306	0.46175	2.27044	4.22355	19.8166	9.52399	23.81	0
69	14.2258	0.421232	2.2288	4.70511	21.5444	7.52978	18.8244						69	30.406	0.442702	2.43192	4.31253	18.8809	10.1565	25.3913
70	13.4041	0.412762	2.5055	4.92478	21.1323	8.33005	20.8251	0					70	24.5375	0.450181	2.36128	4.27519	19.4475	9.99655	24.9914	0

## Sheet: Red Sea long cores only forams
			NBW-9	NBW-45	NBW-54	NBW-63	NBE-18	NBE-48	NBE-63
	Abundance	Total number/ml	2074	1866	1248	1597	876	992	976
	SEAGRASS (%)	YES	18.2099	17.6672	18.9744	13.141	26.2987	21.6129	24.2623
		NO	81.7901	81.8182	77.9487	86.859	73.7013	75.4839	75.082
	Seagrass/hard substrate (%)	v	85.8025	87.8216	83.3333	86.5385	92.2078	85.8065	92.459
	(S/H)	n	14.1975	11.6638	13.5897	13.4615	7.79221	11.2903	6.88525
	SUBORDER (%)	Miliolina	71.2963	70.3259	67.6923	69.2308	74.026	74.8387	72.1311
		Rotaliina	26.2346	27.1012	26.9231	28.8462	25	21.9355	24.918
		Globigerinina	0.617284	0.51458	0.769231	1.28205	0.974026	0	0.655738
		Textulariina	1.54321	1.54374	1.53846	0.641026	0	0.322581	1.63934
	CLASS (%)	Soritidae	4.62963	3.43053	4.87179	2.24359	3.8961	1.6129	3.60656
		Peneroplidae	13.2716	12.693	10.7692	8.97436	21.1039	19.0323	18.6885
		Elphidiidae	4.93827	3.43053	5.64103	4.80769	3.24675	6.12903	2.29508
		Amphisteginidae	17.284	18.0103	14.359	15.3846	19.1558	14.8387	20.6557
		Miliolidae	31.1728	36.8782	35.8974	40.3846	36.039	37.4194	34.7541
		Haureinidae	16.9753	13.3791	11.0256	13.4615	11.3636	12.5806	12.459
		Globigerina	0.617284	0.51458	0.769231	1.28205	0.974026	0	0.655738
		Nubecularidiae	0.308642	0	0.769231	0	0.324675	0.322581	0.983607
		Fischerinidae	0.617284	1.20069	0.769231	0.320513	0.324675	1.93548	0.655738
		Spiroloculinidae	1.85185	1.02916	1.53846	1.92308	0.324675	0.645161	0.327869
		Textularia	1.54321	1.54374	1.53846	0.641026	0	0.322581	1.63934
		Nummulitidae	0.617284	0	0	0	0	0	0
		Ammonidiidae	0.925926	1.88679	0.769231	1.60256	0.974026	0	0.983607
		Alveolinidae	2.46914	1.71527	2.05128	1.92308	0.649351	1.29032	0.655738
		Nononidae	0.925926	0.343053	0.769231	0.320513	0.324675	0.322581	0
		Rosalinidae	0.925926	0	0.512821	1.28205	0	0	0
		Cibicidae	0.617284	1.37221	1.53846	1.28205	0	0	0
		Reussellidae	0	0.51458	0.512821	1.28205	0	0	0
		Acervulinidae	0	1.54374	2.5641	1.92308	0.974026	0.645161	0.983607
		Bolivinidae	0	0	0.25641	0.961538	0.324675	0	0

## Sheet: Red Sea short cores
1600W	Fines	Porosity	Microplastics		1000W	Fines	Porosity	Microplastics		550W	Fines	Porosity	Microplastics		500E	Fines	Porosity	Microplastics
Depth (cm)	silt+clay (%)	(φ)	items/triple unit		Depth (cm)	silt+clay (%)	(φ)	items/triple unit		Depth (cm)	silt+clay (%)	(φ)	items/triple unit		Depth (cm)	silt+clay (%)	(φ)	items/triple unit
1	18.6666	0.58429			1	12.8632	0.568745			1	18.1064	0.490369			1	10.3974	0.517622
2	19.4073	0.558722	1		2	15.2287	0.514376	0		2	17.5923	0.486377	0		2	11.2122	0.462879	0
3	15.5579	0.544729			3	14.7974	0.510817			3	21.537	0.497168			3	12.7725	0.444098
4	16.5238	0.535901			4	15.3329	0.497078			4	25.3942	0.502652			4	11.6032	0.441535
5	16.8366	0.518524	0		5	15.8024	0.488229	1		5	21.7938	0.486926	1		5	13.9281	0.44238	0
6	17.7745	0.501093			6	16.4514	0.484269			6	25.845	0.477614			6	12.9693	0.448453
7	19.7291	0.49066			7	16.1393	0.476656			7	14.843	0.481942			7	21.9828	0.43129
8	19.9061	0.486665	0		8	17.6317	0.484989	1		8	14.2105	0.479982	0		8	15.6366	0.477651	1
9	20.0428	0.482524			9	17.5491	0.478572			9	25.2371	0.462375			9	8.50168	0.428466
10	18.7965	0.478242			10	18.5541	0.487131			10	15.7122	0.458874			10	11.9862	0.418649
11	17.5389	0.474237	1		11	13.8575	0.49329	2		11	16.75	0.444252	0		11	13.6274	0.362567	0
12	17.7006	0.474968			12	13.8465	0.487608			12	20.211	0.438844			12	14.414	0.413238
13	16.452	0.475391			13	17.8183	0.483509			13	18.7097	0.439453			13	14.5426	0.414939
14	20.5434	0.472041	0		14	20.71	0.472597	0		14	16.7346	0.437689	0		14	11.2578	0.395908	0
15	18.7332	0.474318			15	22.2499	0.47374			15	17.5505	0.44353			15	13.1754	0.389158
16	18.8101	0.470787			16	18.7712	0.471673			16	14.8079	0.436369			16	15.9102	0.396138
17	21.2972	0.472346	2		17	20.6289	0.470351	0		17	17.1262	0.434491	0		17	17.4613	0.406277	0
18	19.8655	0.480084			18	21.21	0.470516			18	20.1522	0.438073			18	14.5975	0.411216
19	17.6266	0.475202			19	26.1139	0.466813			19	19.4202	0.438893			19	9.90793	0.422434
20	22.1809	0.479409	1		20	19.6807	0.473811	1		20	21.0328	0.441285	0		20	10.9054	0.436014	0

## Sheet: Mediterranean Sea cores
T3-60	Fines	Foram abundance		T6-40	Fines	Foram abundance		EMT13-C6	Fines	Foram abundance		T11-40	Fines	Foram abundance
Depth (cm)	silt+clay (%)	(#/ml)		Depth (cm)	silt+clay (%)	(#/ml)		Depth (cm)	silt+clay (%)	(#/ml)		Depth (cm)	silt+clay (%)	(#/ml)
1	29.4682	2649.6		1	17.5263	1984		1	5.3789	1626		1	48.9655	1213
2	44.9427	2291.2		2	24.5497	2899		2	5.60514	1574		2	55.596	1232
3	49.3325	1900.8		3	23.5154	2336		3	7.42723	1638		3	65.1375	1094
4	60.0909	1491.2		4	29.236	1914		4	9.99615	1286		4	66.2044	976
5	59.7161	1132.8		5	34.3352	2067		5	9.70142	1510		5	70.039	771
6	59.3201	1209.6		6	40.2048	2061		6	11.9104	1843		6	72.713	414
7	73.0034	995.2		7	39.4927	1494		7	13.7873	1376		7	76.6863	586
8	78.0147	507.2		8	41.3952	1702		8	13.3058	1414		8	68.0205	520
9	83.3144	372.267		9	38.9826	1296		9	22.3588	1850		9	76.4499	563
10	86.9584	305.067		10	48.3226	989		10	47.8698	1421		10	84.6079	160
11	78.9801	465.067		11	49.3413	1350		11	43.8913	630		11	86.3135	101
				12	43.2205	1050		12	92.5705	140*		12	87.4959	76
				13	47.1828	1446		13	88.6512			13	90.9573	63
				14	52.5423	1155		14	100	92*		14	90.1298	76
				15	62.1014	1216		15	100			15	88.8596	76
				16	84.7602	349		16	100	426
				17	84.85	283		17	100	491
				18	83	296		18	100	318
								19	89.3292	587
								20	100	894
								21	100	638
								22	86.1258	454
								23	78.6856	223
								24	83.8291	322
								25	84.5449	220
										*2 cm section
